# Supplementary material for: Anticancer potential of NSAID-derived tris(pyrazolyl)methane ligands in iron(ii) sandwich complexes
Source: Royal Society of Chemistry journal article supplement (doi:10.1039/d4dt00920g), 2024-01-01
Supplement: d4dt00920g1.pdf [file d4dt00920g1.pdf]

# Supporting Information

| <b>Table of contents</b>                                                 | <b>Pages</b> |
|--------------------------------------------------------------------------|--------------|
| X-ray crystallography ( <b>Table S1</b> and <b>Figure S1</b> )           | S2           |
| IR spectra in solid state ( <b>Figures S2–S8</b> )                       | S4–S6        |
| NMR spectra in organic solvents ( <b>Figures S9–S24</b> )                | S7–S14       |
| Experiments in aqueous media                                             | S15          |
| NMR spectra in aqueous solutions ( <b>Figures S25–S27</b> )              | S17–S18      |
| DNA fluorescent indicator displacement (FID) assay ( <b>Figure S28</b> ) | S19          |
| References                                                               | S20          |

## X-ray crystallography

Crystal data and collection details for **1'** and **tpm<sup>IBU</sup>** are reported in Table S1. Data were recorded on a Bruker APEX II diffractometer equipped with a PHOTON2 detector using Mo–K $\alpha$  radiation. Data were corrected for Lorentz polarization and absorption effects (empirical absorption correction SADABS).<sup>1</sup> The structure was solved by direct methods and refined by full-matrix least-squares based on all data using  $F^2$ .<sup>2</sup> Hydrogen atoms were fixed at calculated positions and refined by a riding model. All non-hydrogen atoms were refined with anisotropic displacement parameters.

**Table S1.** Crystal data and measurement details for **1'** and **tpm<sup>IBU</sup>**

|                                                | <b>1'</b>                                                                        | <b>tpm<sup>IBU</sup></b>                                      |
|------------------------------------------------|----------------------------------------------------------------------------------|---------------------------------------------------------------|
| Formula                                        | C <sub>20</sub> H <sub>20</sub> F <sub>12</sub> FeN <sub>12</sub> P <sub>2</sub> | C <sub>24</sub> H <sub>28</sub> N <sub>6</sub> O <sub>2</sub> |
| FW                                             | 774.27                                                                           | 432.52                                                        |
| T, K                                           | 100(2)                                                                           | 100(2)                                                        |
| $\lambda$ , Å                                  | 0.71073                                                                          | 0.71073                                                       |
| Crystal system                                 | Monoclinic                                                                       | Monoclinic                                                    |
| Space group                                    | $P2_1/n$                                                                         | $P2_1/n$                                                      |
| $a$ , Å                                        | 7.5010(6)                                                                        | 13.0977(7)                                                    |
| $b$ , Å                                        | 16.7642(14)                                                                      | 8.4764(5)                                                     |
| $c$ , Å                                        | 11.2100(10)                                                                      | 20.6292(11)                                                   |
| $\beta$ , °                                    | 93.792(3)                                                                        | 94.579(2)                                                     |
| Cell Volume, Å <sup>3</sup>                    | 1406.6(2)                                                                        | 2283.0(2)                                                     |
| Z                                              | 2                                                                                | 4                                                             |
| $D_c$ , g·cm <sup>-3</sup>                     | 1.828                                                                            | 1.258                                                         |
| $\mu$ , mm <sup>-1</sup>                       | 0.769                                                                            | 0.083                                                         |
| F(000)                                         | 776                                                                              | 920                                                           |
| Crystal size, mm                               | 0.16×0.14×0.12                                                                   | 0.25×0.21×0.19                                                |
| $\theta$ limits, °                             | 2.189–26.999                                                                     | 1.981–26.999                                                  |
| Reflections collected                          | 20477                                                                            | 32182                                                         |
| Independent reflections                        | 3058 [ $R_{int}$ = 0.1443]                                                       | 4906 [ $R_{int}$ = 0.0412]                                    |
| Data / restraints / parameters                 | 3058 / 0 / 214                                                                   | 4906 / 0 / 292                                                |
| Goodness on fit on $F^2$                       | 1.130                                                                            | 1.103                                                         |
| $R_1$ ( $I > 2\sigma(I)$ )                     | 0.0638                                                                           | 0.0498                                                        |
| $wR_2$ (all data)                              | 0.1434                                                                           | 0.1157                                                        |
| Largest diff. peak and hole, e Å <sup>-3</sup> | 0.968 / –0.711                                                                   | 0.416 / –0.257                                                |

**Figure S1.** View of the X-ray structure of  $[\text{Fe}(\kappa^3\text{-tpm})_2][\text{PF}_6]_2$ , **1'**. Displacement ellipsoids are at the 50% probability level. Selected bond lengths (Å) and angles (°): Fe(1)-N(1) 1.962(3), Fe(1)-N(3) 1.962(3), Fe(1)-N(5) 1.969(3), N(1)-N(2) 1.365(5), N(3)-N(4) 1.366(5), N(5)-N(6) 1.362(5), N(2)-C(10) 1.439(5), N(4)-C(10) 1.437(5), N(6)-C(10) 1.439(6), N(1)-Fe(1)-N(3) 87.66(14), N(1)-Fe(1)-N(5) 86.95(14), N(3)-Fe(1)-N(5) 88.29(14), N(1)-Fe(1)-N(1)<sup>i</sup> 180.0, N(3)-Fe(1)-N(3)<sup>i</sup> 180.0, N(5)-Fe(1)-N(5)<sup>i</sup> 180.0, N(2)-C(10)-N(4) 109.8(3), N(2)-C(10)-N(6) 109.7(3), N(4)-C(10)-N(6) 109.7(3). Atoms labelled A(X)<sup>i</sup> have been generated by symmetry operation:  $-x+1, -y+1, -z+2$ .

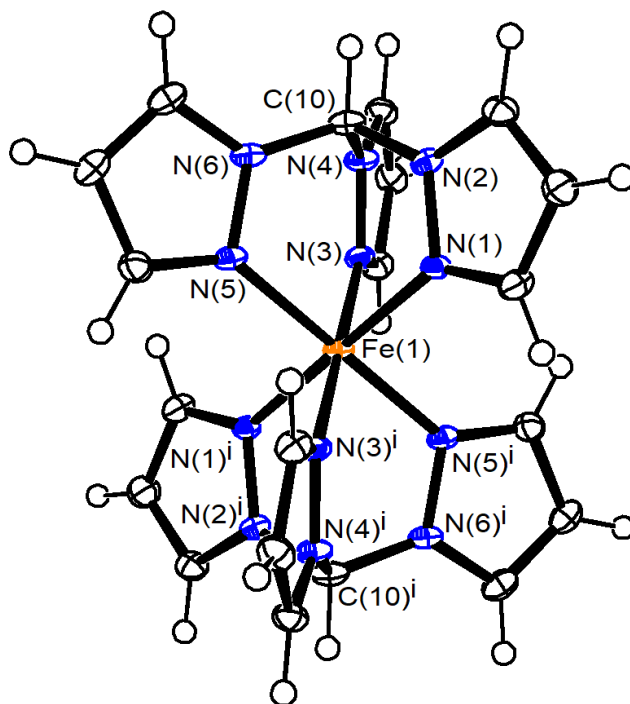

## IR spectra

**Figure S2.** Solid-state IR spectrum ( $650\text{-}4000\text{ cm}^{-1}$ ) of **Tpm<sup>OH</sup>**.

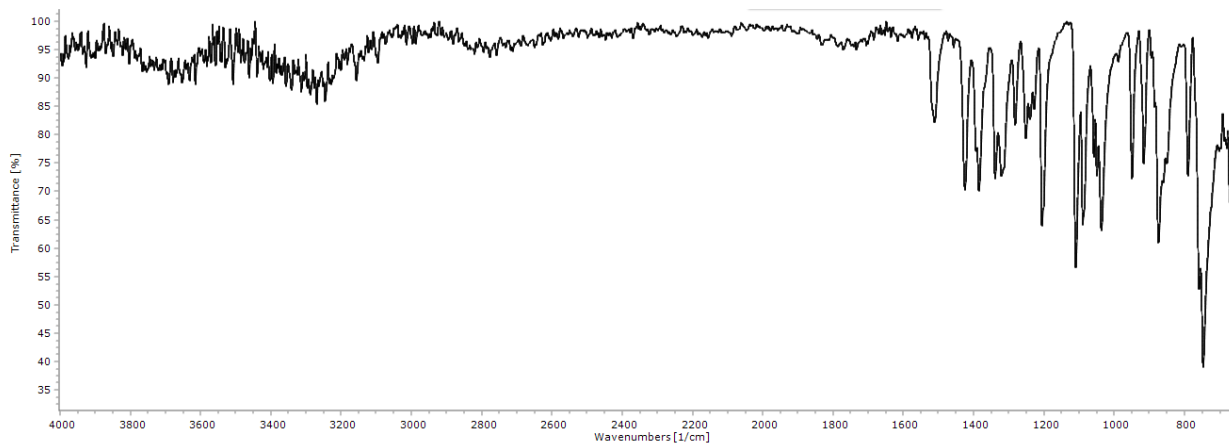

**Figure S3.** Solid-state IR spectrum ( $650\text{-}4000\text{ cm}^{-1}$ ) of **Tpm<sup>IBU</sup>**.

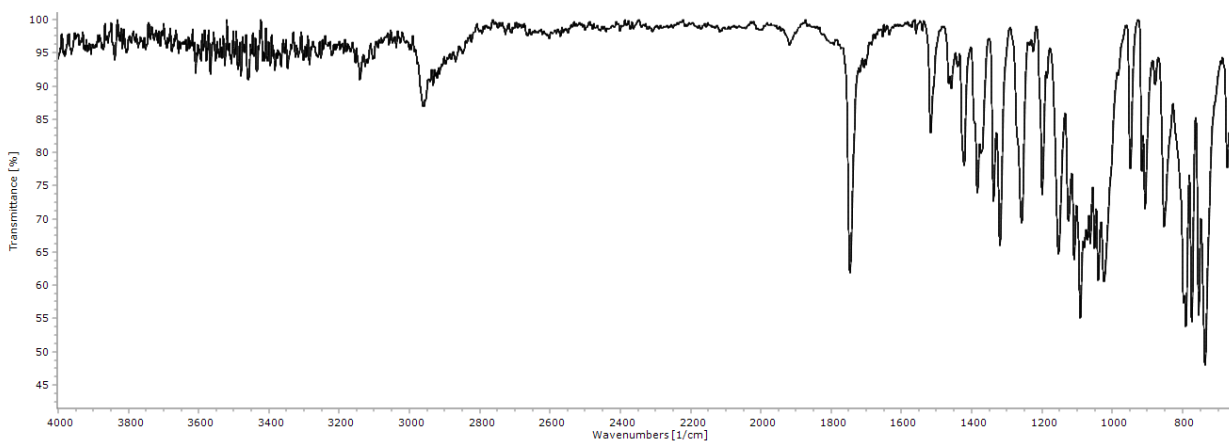

**Figure S4.** Solid-state IR spectrum ( $650\text{-}4000\text{ cm}^{-1}$ ) of **Tpm<sup>FLU</sup>**.

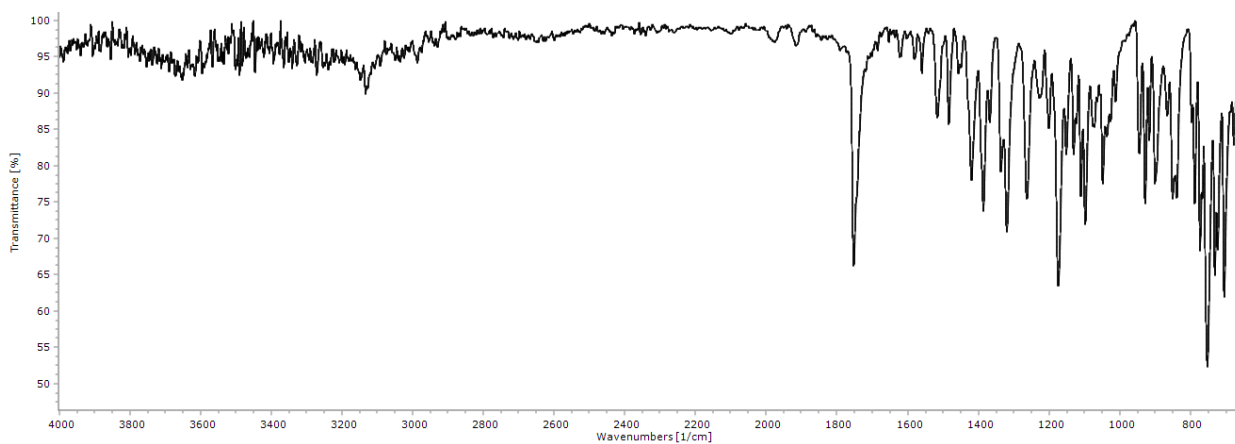

**Figure S5.** Solid-state IR spectrum ( $650\text{-}4000\text{ cm}^{-1}$ ) of **1**.

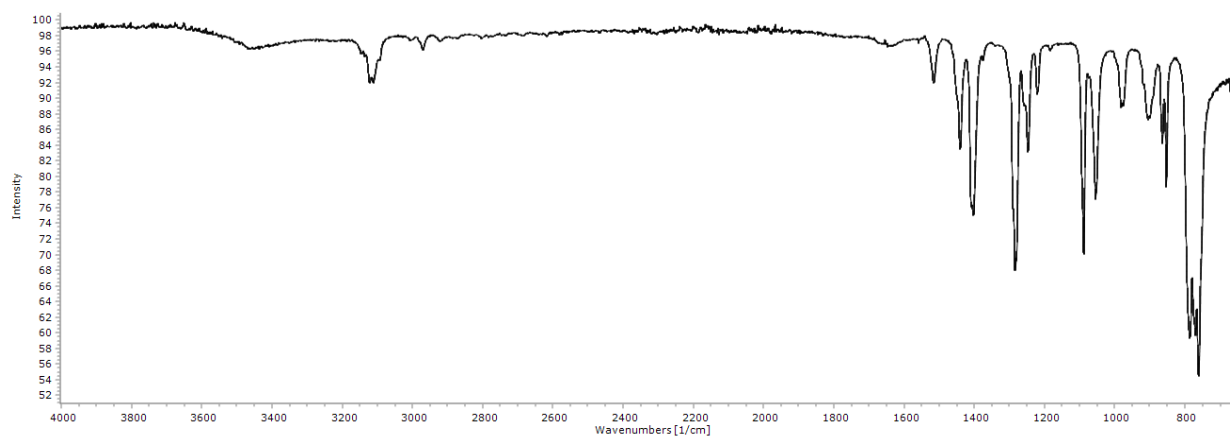

**Figure S6.** Solid-state IR spectrum ( $650\text{-}4000\text{ cm}^{-1}$ ) of **2**.

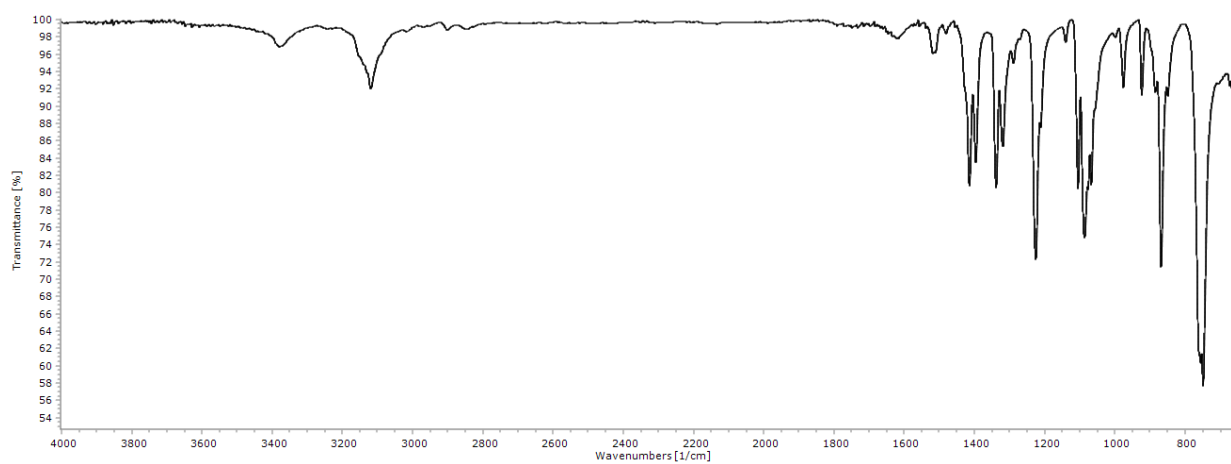

**Figure S7.** Solid-state IR spectrum ( $650\text{-}4000\text{ cm}^{-1}$ ) of **3**.

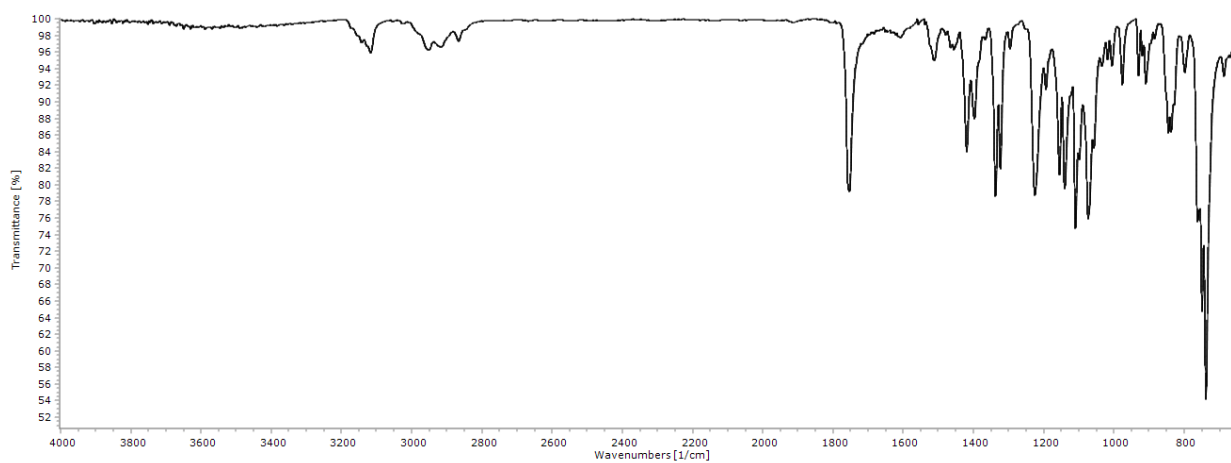

**Figure S8.** Solid-state IR spectrum ( $650\text{-}4000\text{ cm}^{-1}$ ) of **4**.

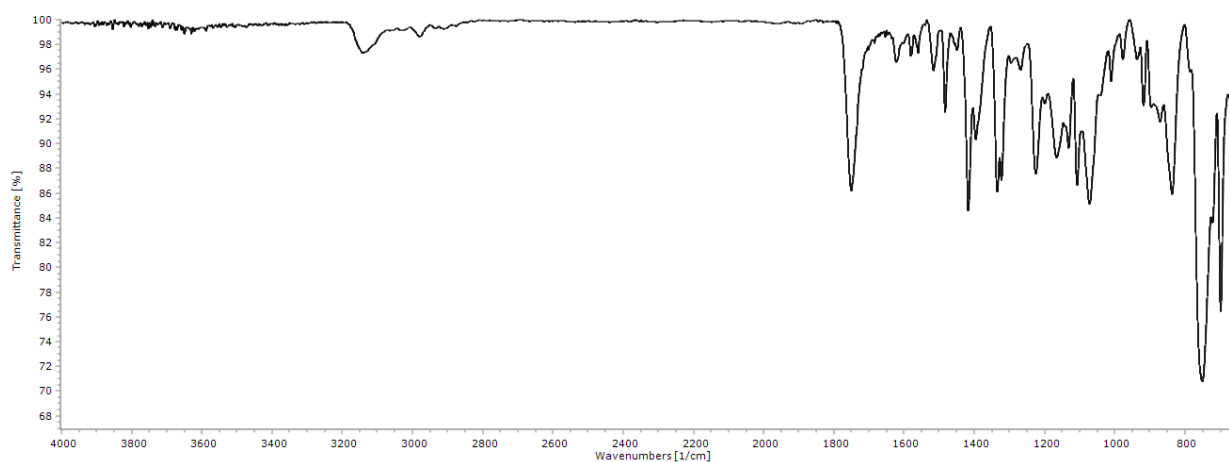

## NMR spectra

Figure S9.  $^1\text{H}$  NMR spectrum (401 MHz,  $\text{CDCl}_3$ ) of **Tpm**<sup>IBU</sup>.

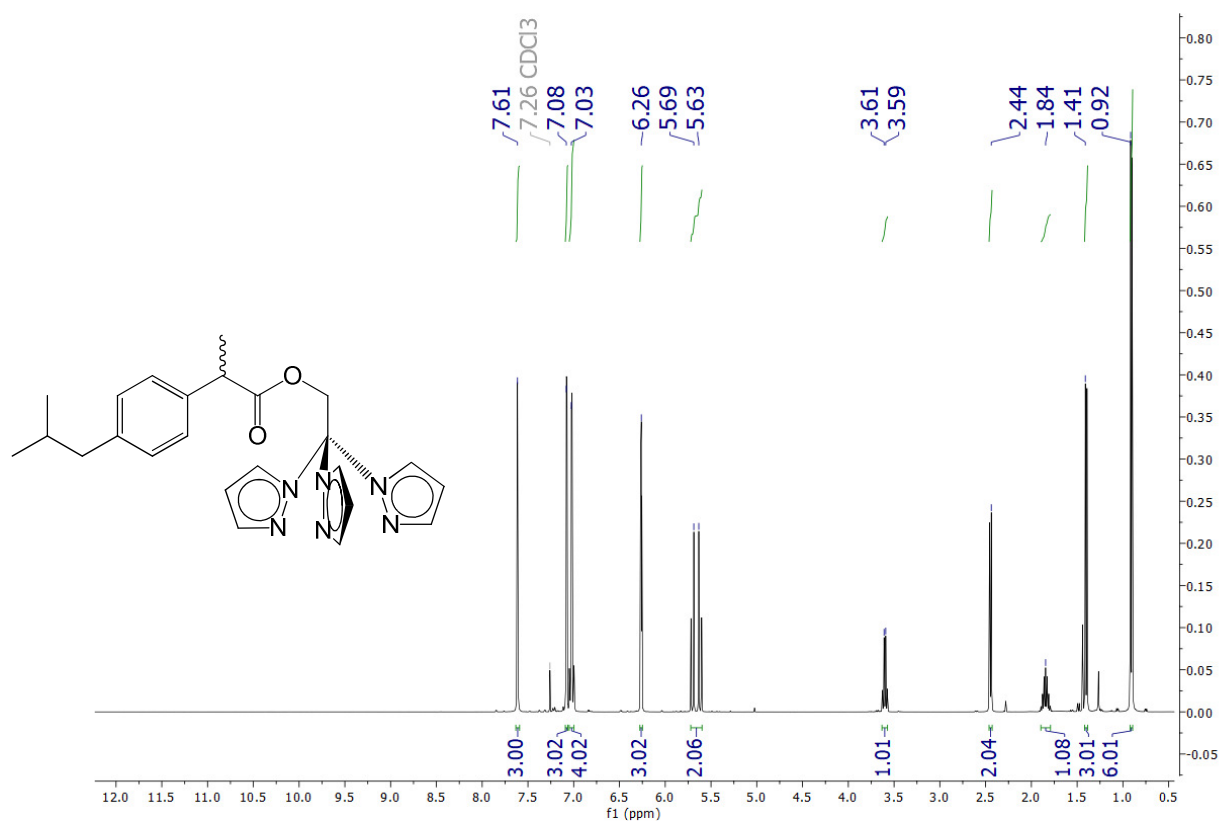

Figure S10.  $^{13}\text{C}$  NMR spectrum (401 MHz,  $\text{CDCl}_3$ ) of **Tpm**<sup>IBU</sup>.

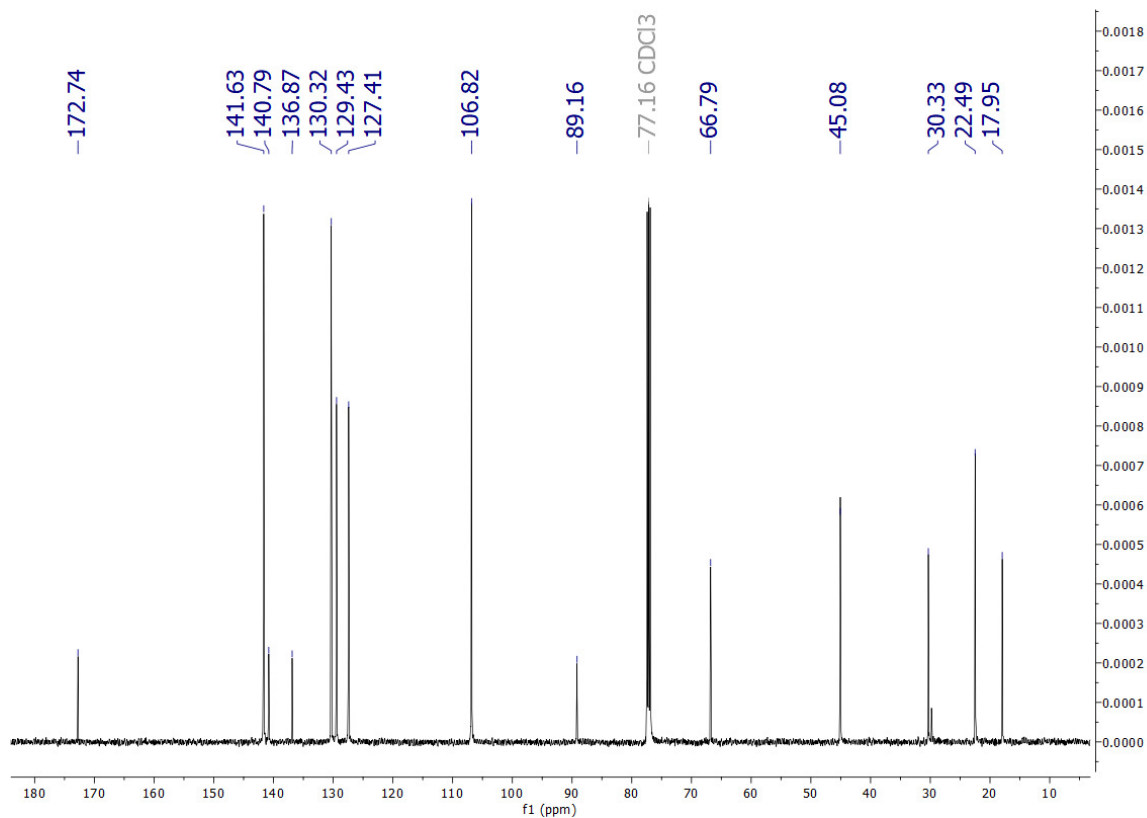

**Figure S11.**  $^1\text{H}$  NMR spectrum (401 MHz,  $\text{CDCl}_3$ ) of **Tpm<sup>FLU</sup>**.

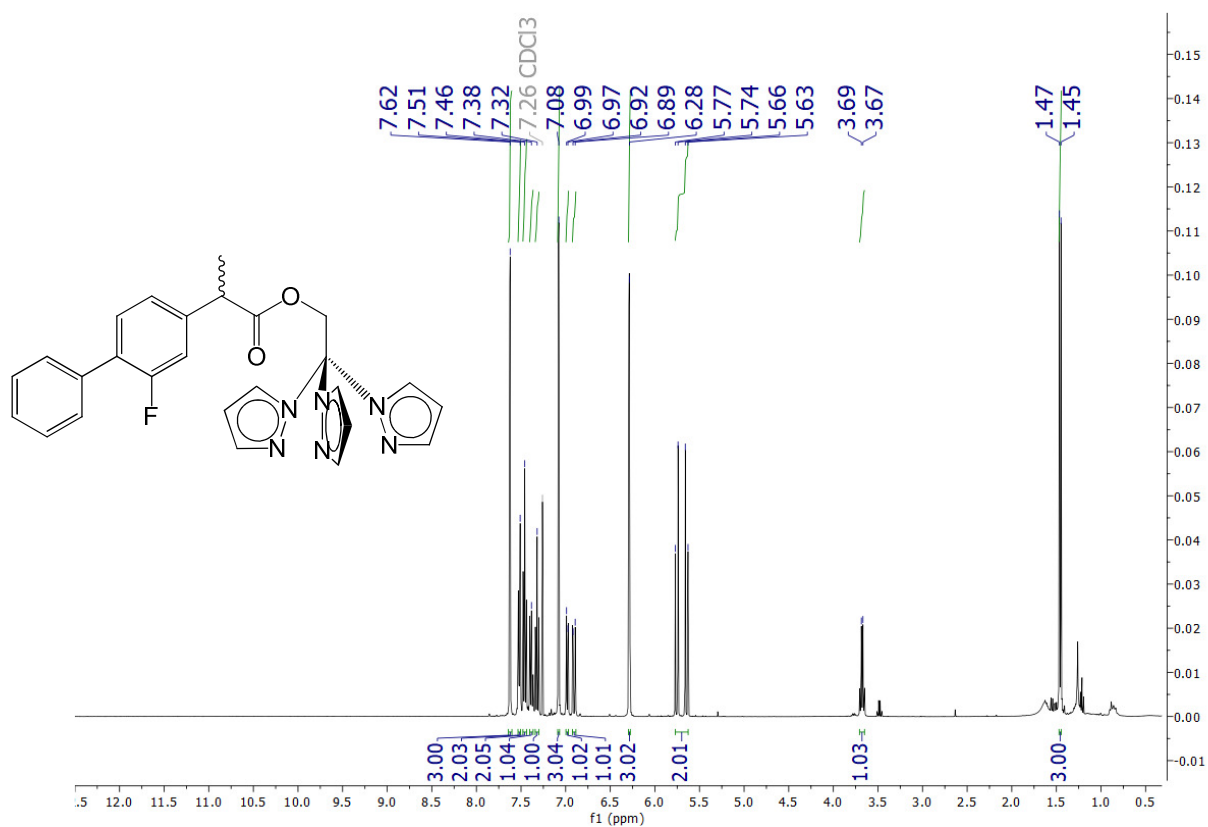

**Figure S12.**  $^{13}\text{C}$  NMR spectrum (401 MHz,  $\text{CDCl}_3$ ) of **Tpm<sup>FLU</sup>**.

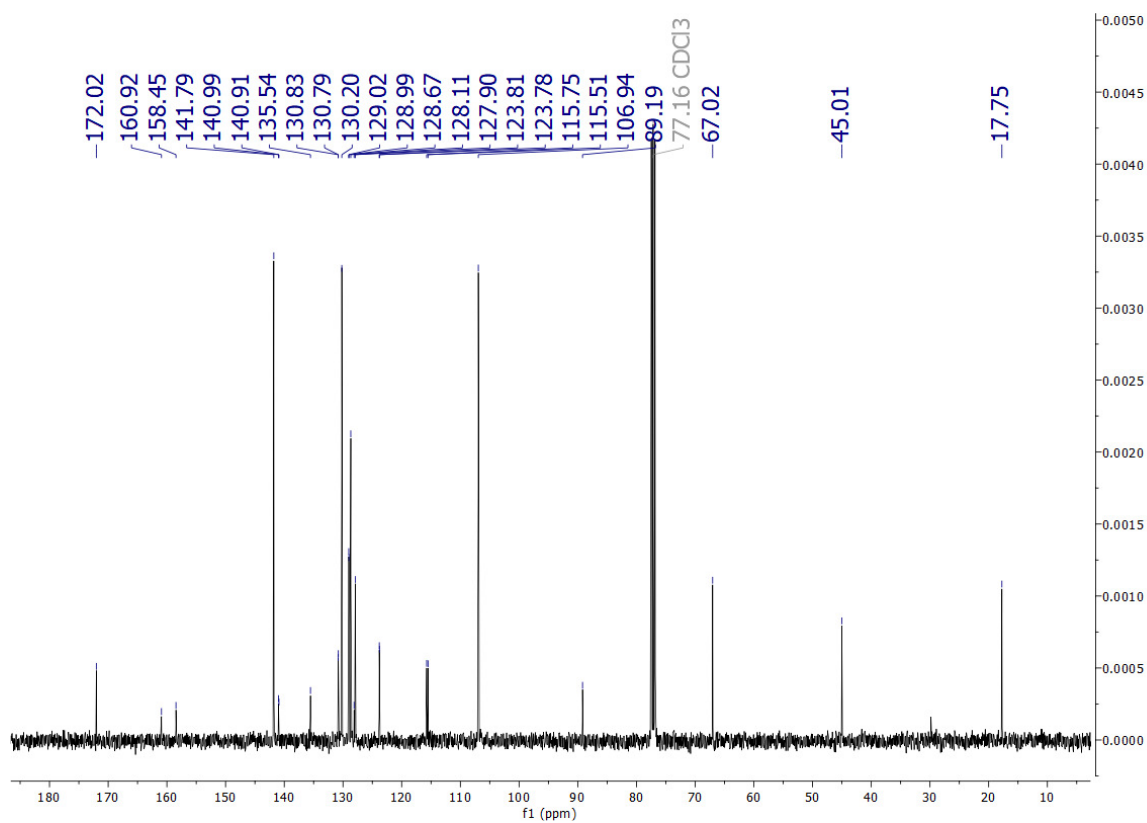



**Figure S13.**  $^{19}\text{F}$  NMR spectrum (401 MHz,  $\text{CDCl}_3$ ) of  $\text{Tpm}^{\text{FLU}}$ .

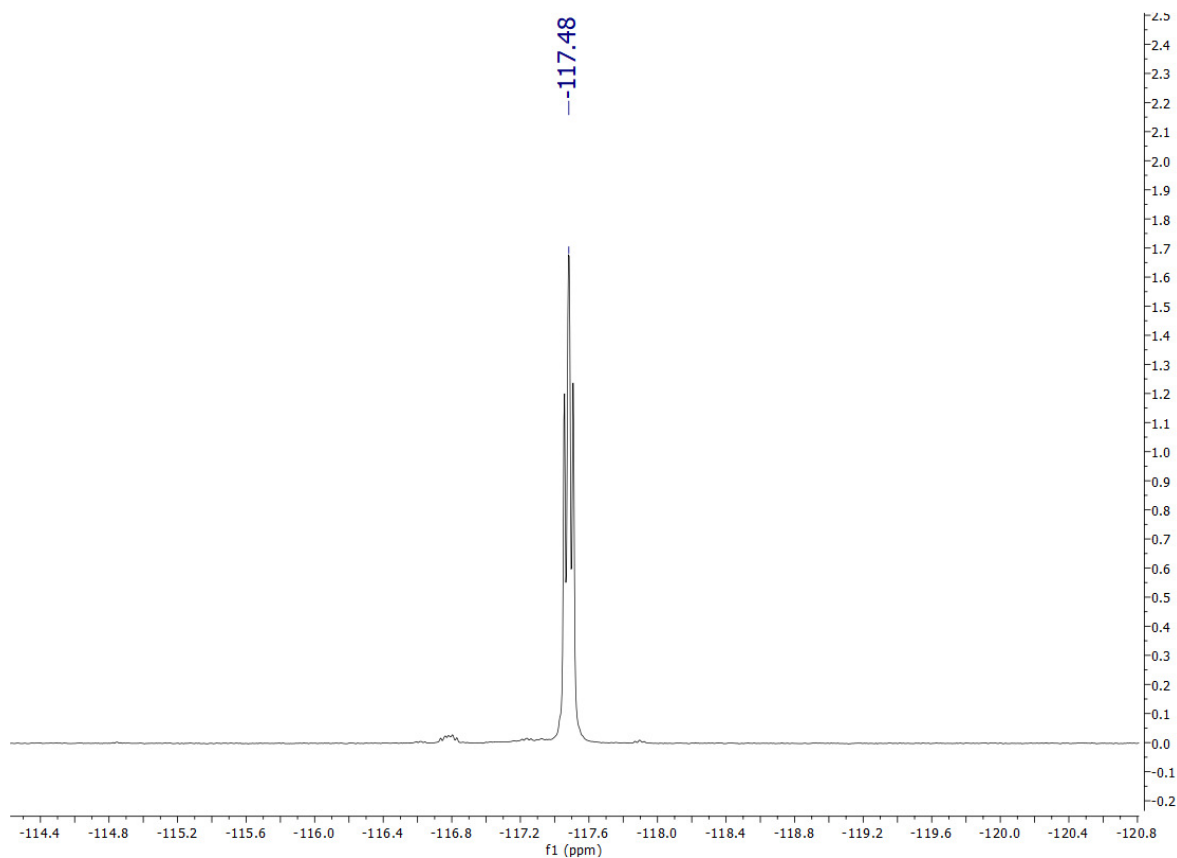

**Figure S14.**  $^1\text{H}$  NMR spectrum (401 MHz,  $\text{D}_2\text{O}$ ) of **1**.

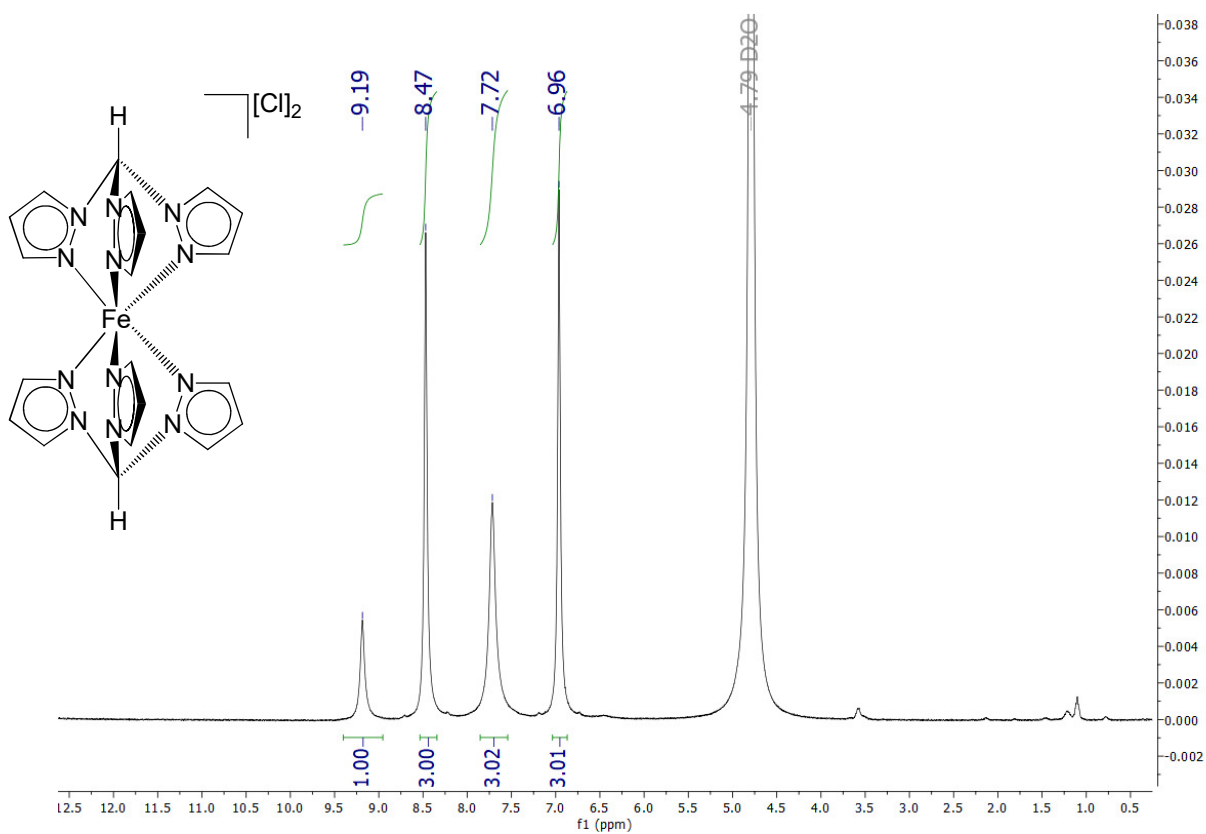

Figure S15.  $^{13}\text{C}$  NMR spectrum (401 MHz,  $\text{D}_2\text{O}$ ) of **1**.

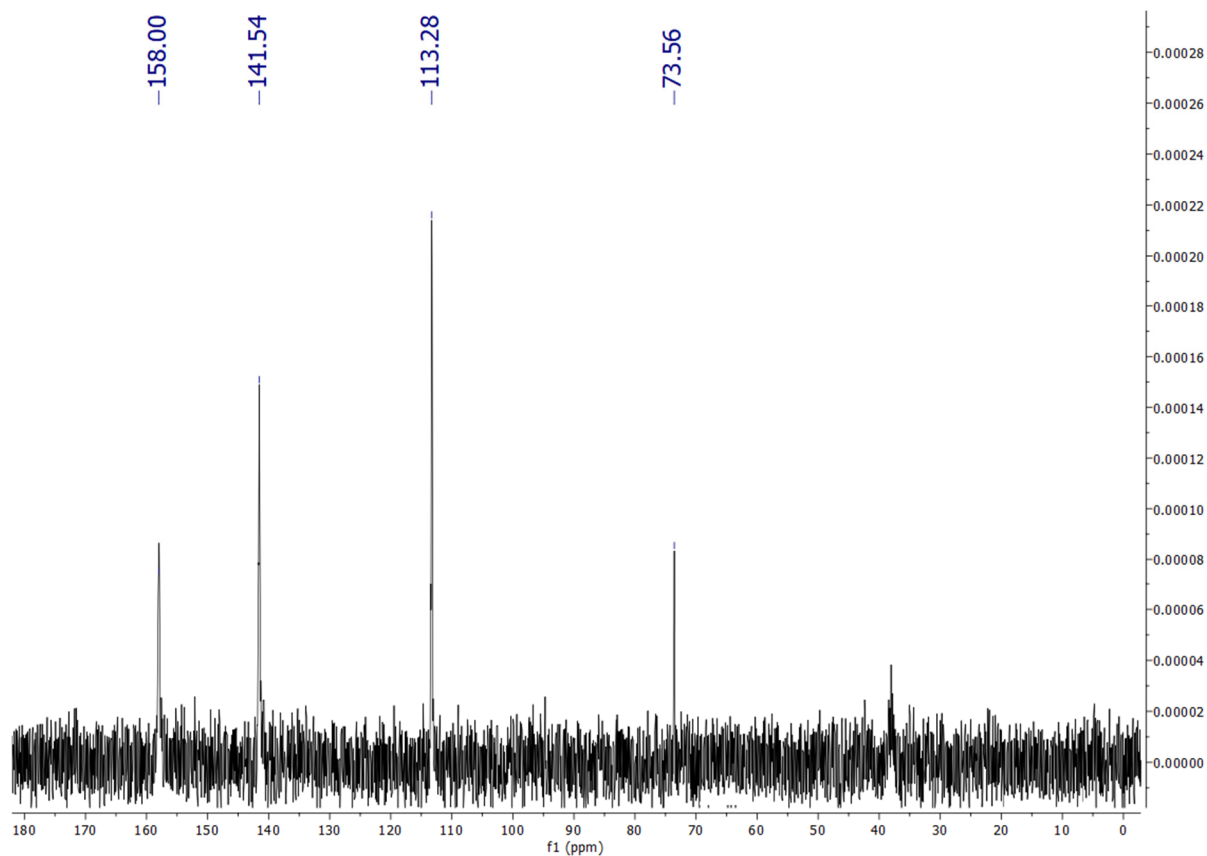

Figure S16.  $^1\text{H}$  NMR spectrum (401 MHz,  $\text{CD}_3\text{OD}$ ) of **2**.

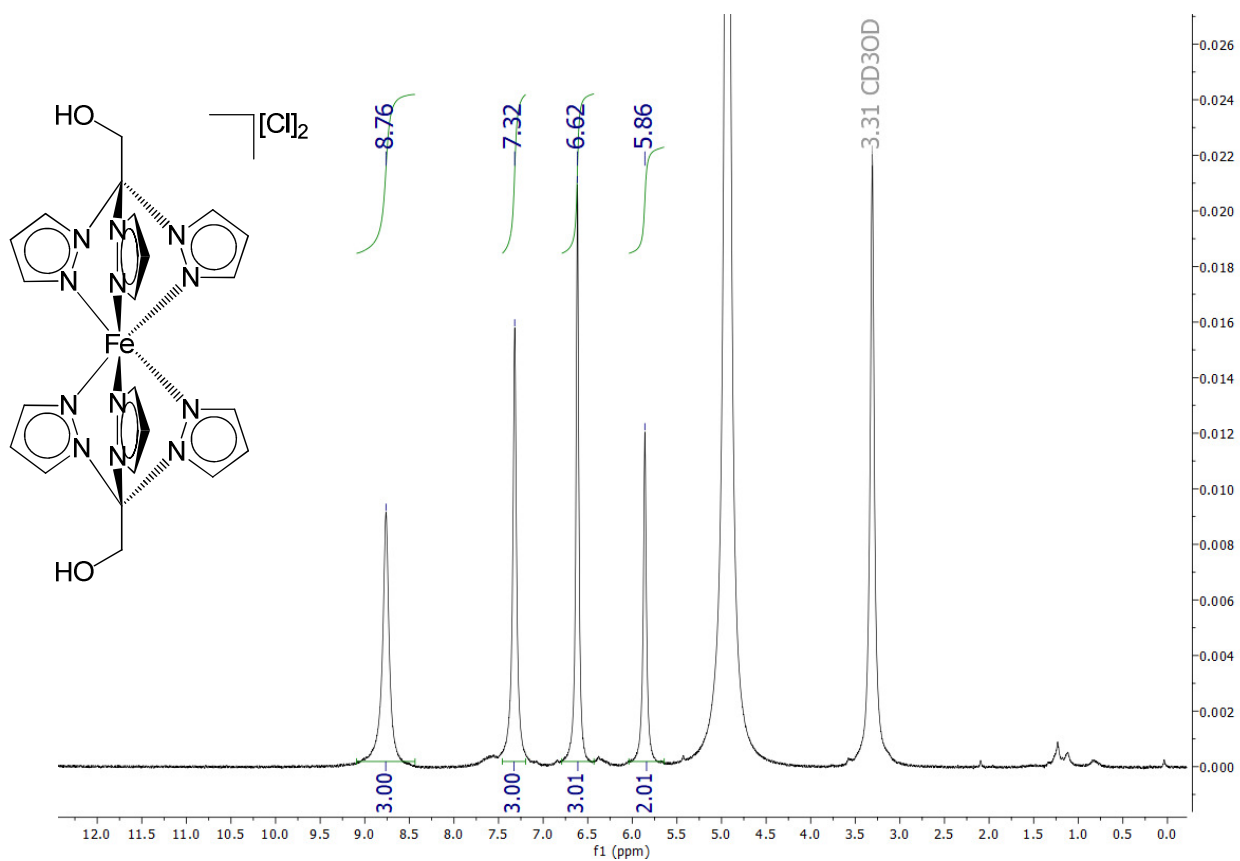

Figure S17.  $^{13}\text{C}$  NMR spectrum (401 MHz,  $\text{CD}_3\text{OD}$ ) of **2**.

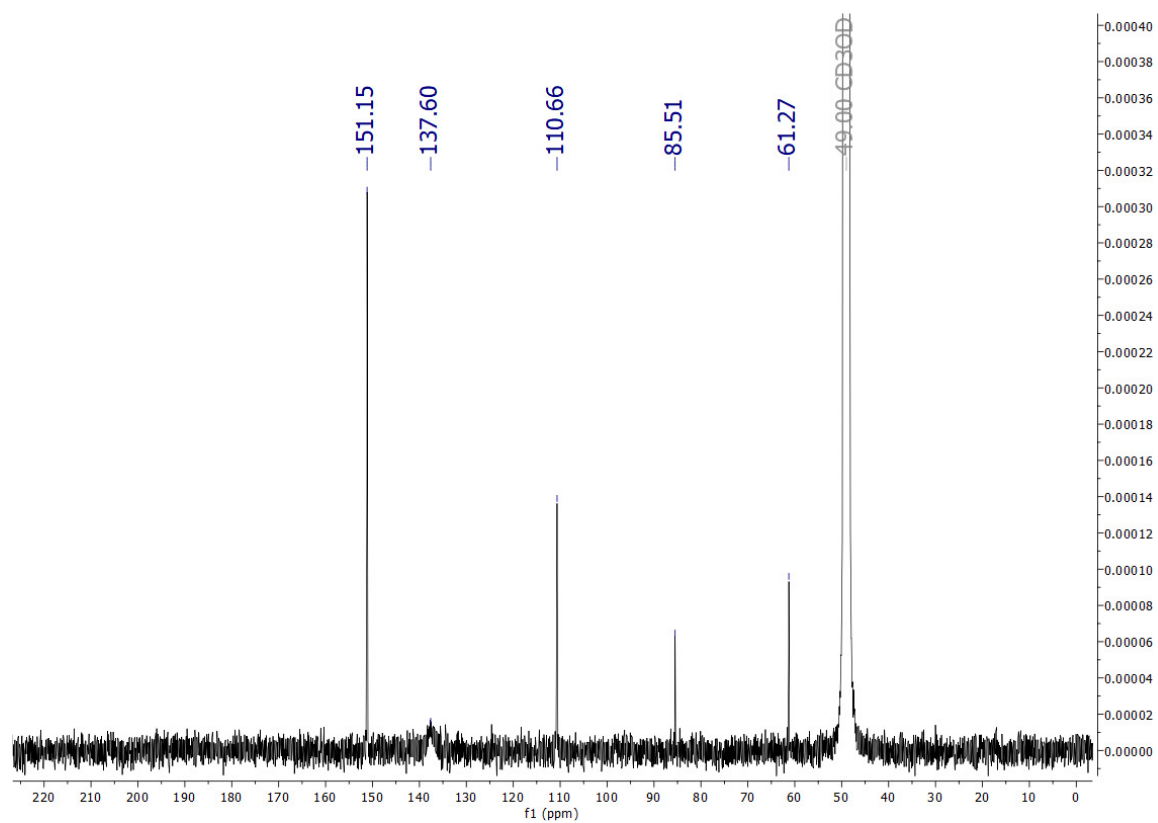

Figure S18.  $^1\text{H}$  NMR spectrum (401 MHz,  $\text{DMSO-d}_6$ ) of **2**.

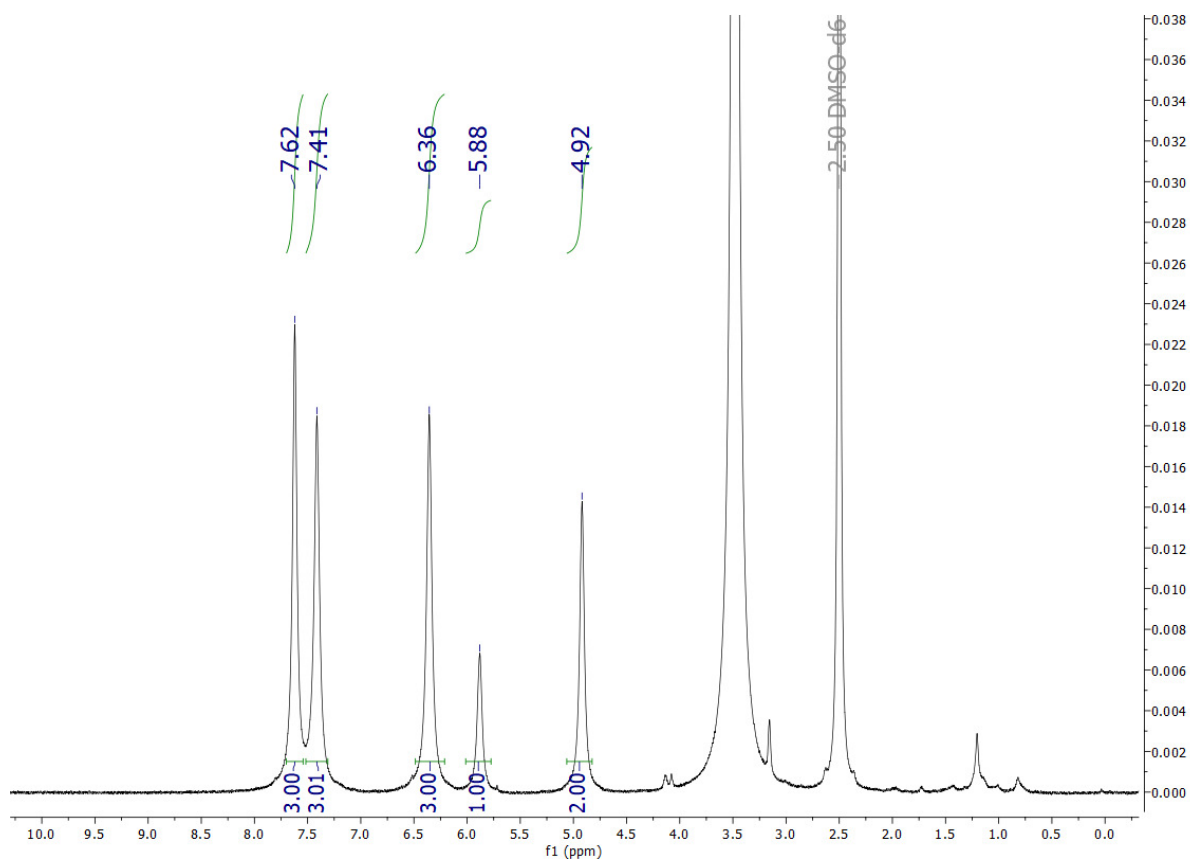

Figure S19.  $^{13}\text{C}$  NMR spectrum (401 MHz,  $\text{DMSO-d}_6$ ) of **2**.

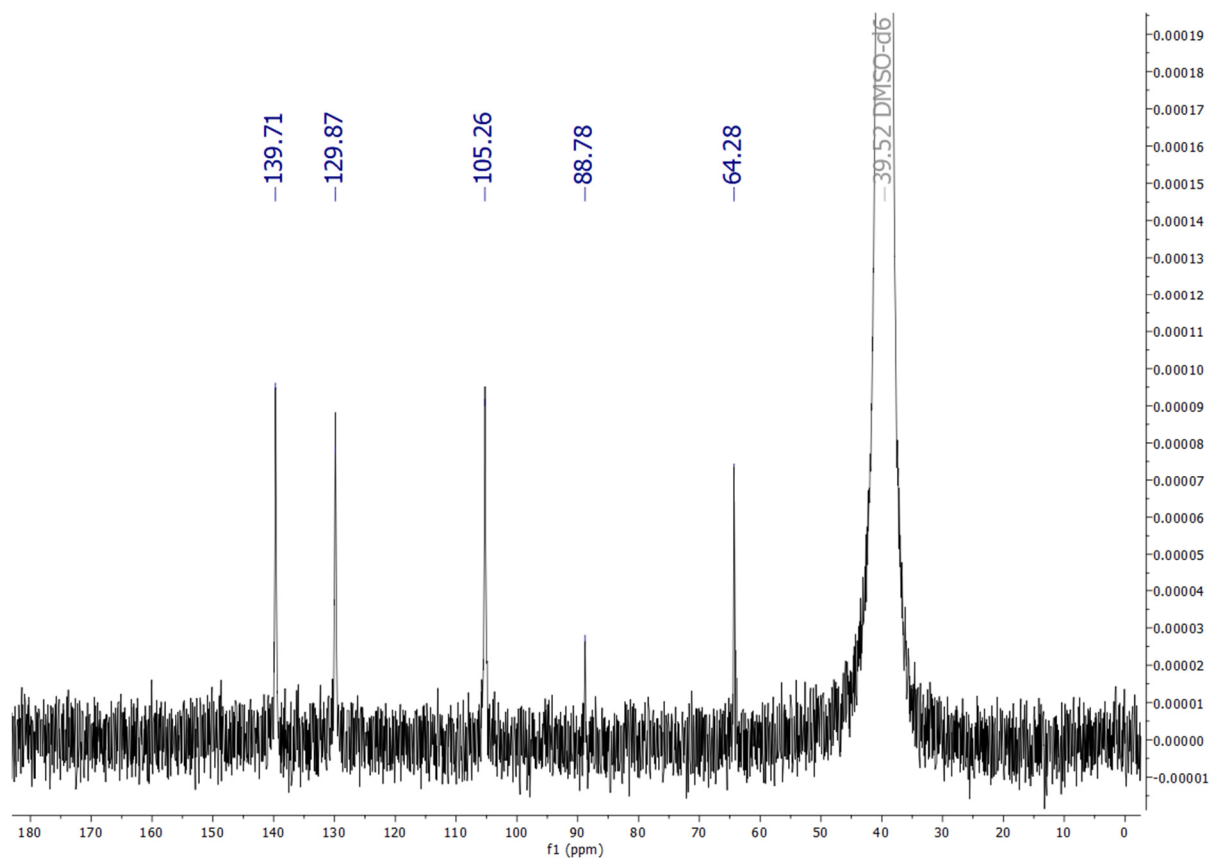

Figure S20.  $^1\text{H}$  NMR spectrum (401 MHz,  $\text{CD}_3\text{OD}$ ) of **3**.

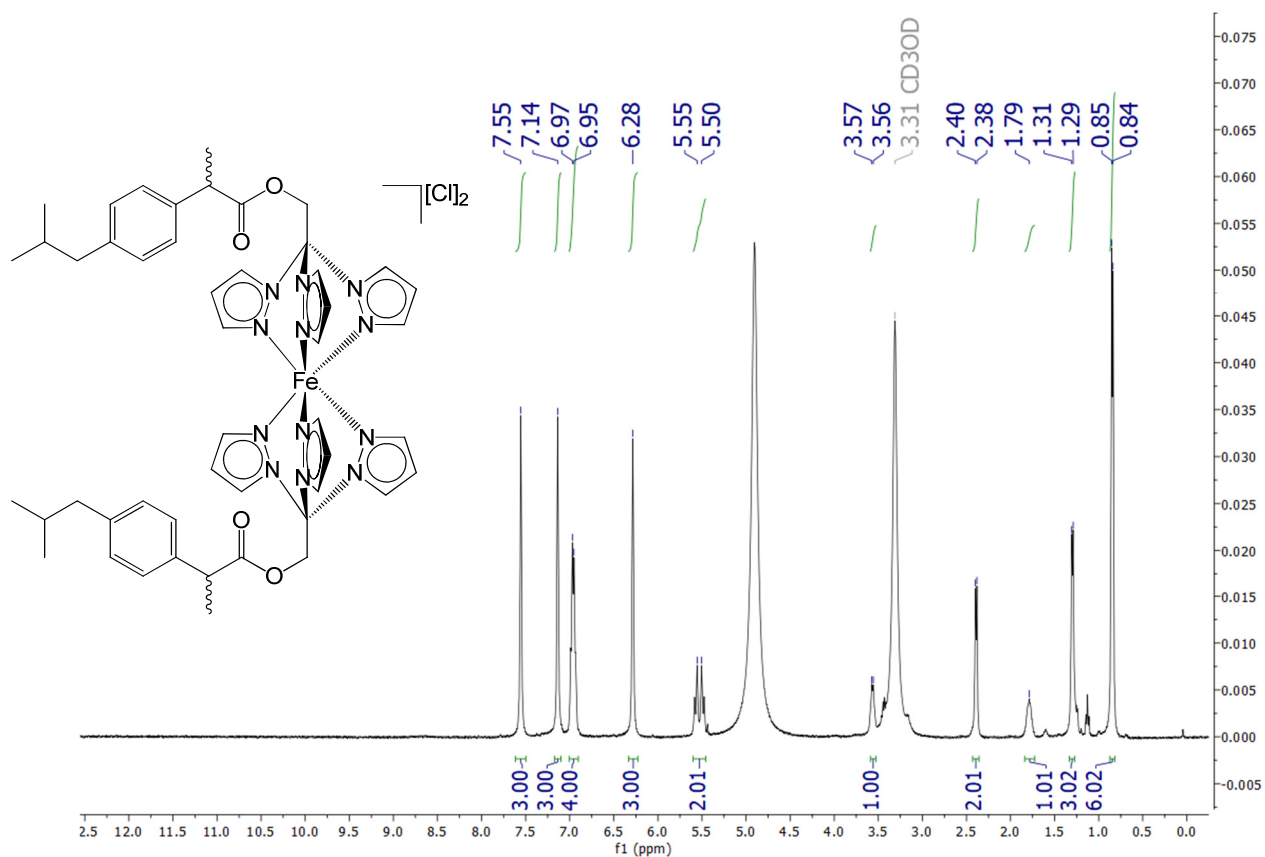

Figure S21.  $^{13}\text{C}$  NMR spectrum (101 MHz,  $\text{CD}_3\text{OD}$ ) of **3**.

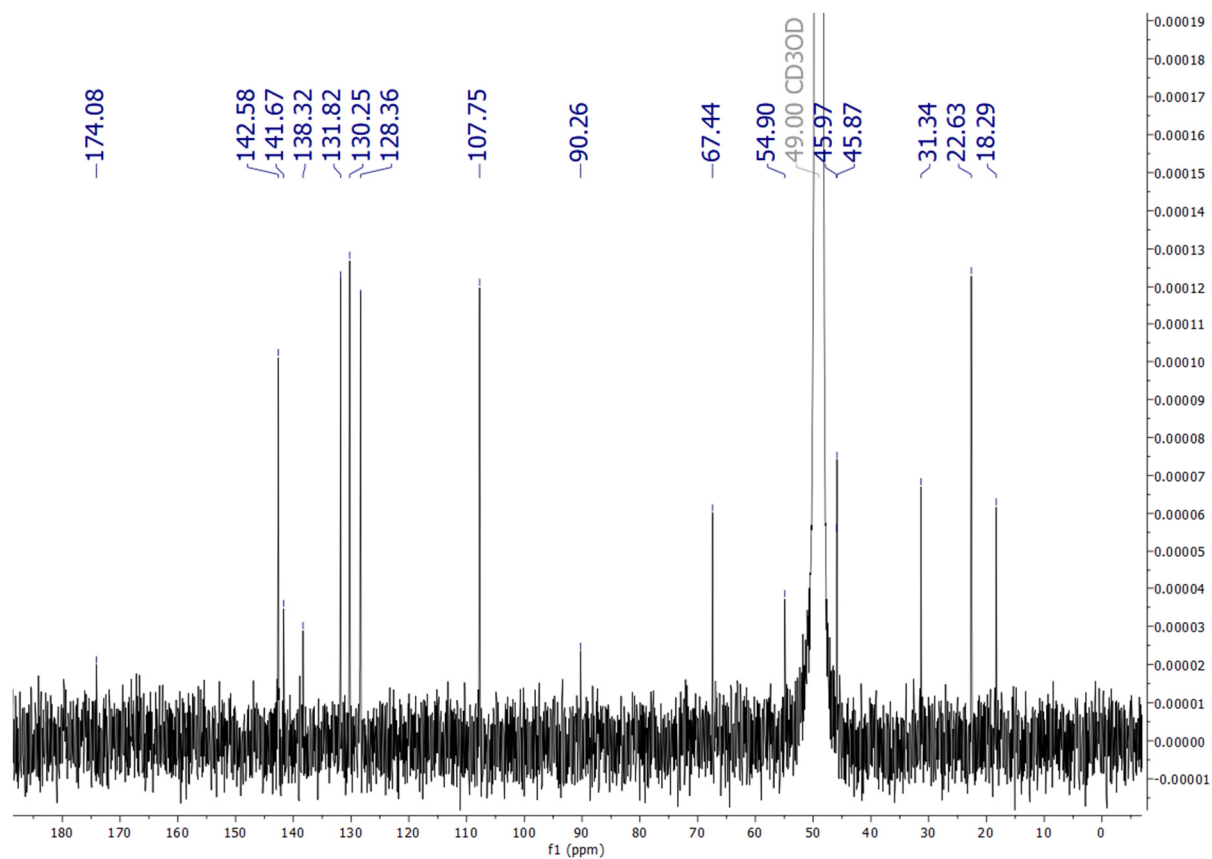

Figure S22.  $^1\text{H}$  NMR spectrum (401 MHz,  $\text{CD}_3\text{OD}$ ) of **4**.

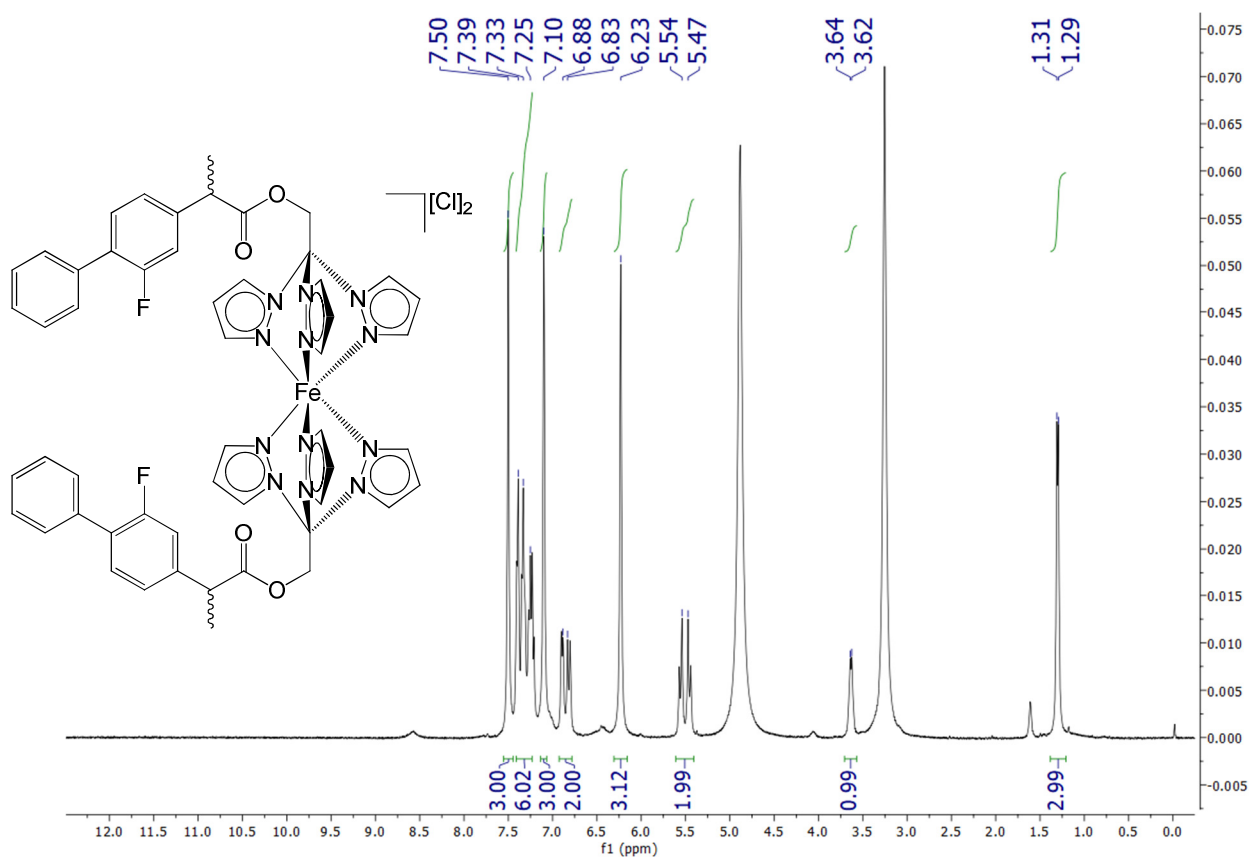

**Figure S23.**  $^{13}\text{C}$  NMR spectrum (101 MHz,  $\text{CD}_3\text{OD}$ ) of **4**.

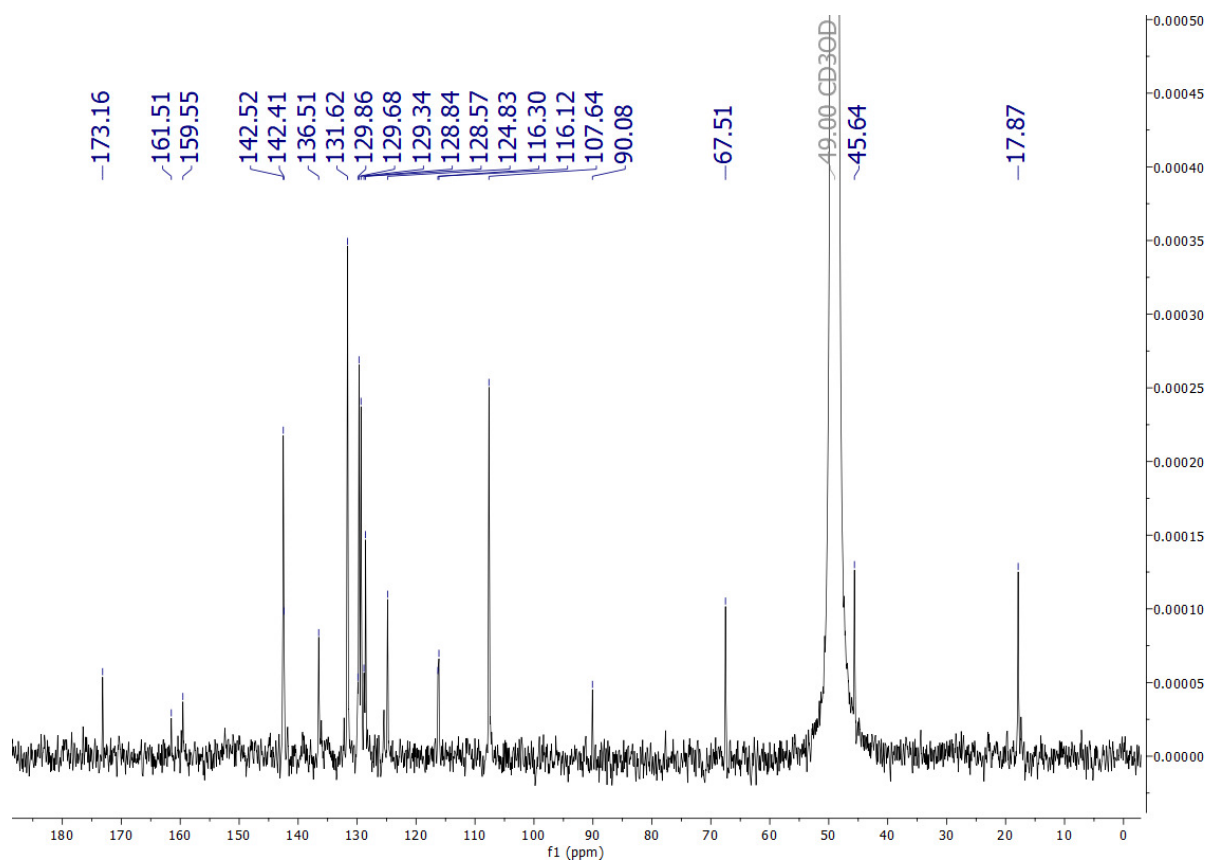

**Figure S24.**  $^{19}\text{F}$  NMR spectrum (401 MHz,  $\text{CDCl}_3$ ) of **4**.

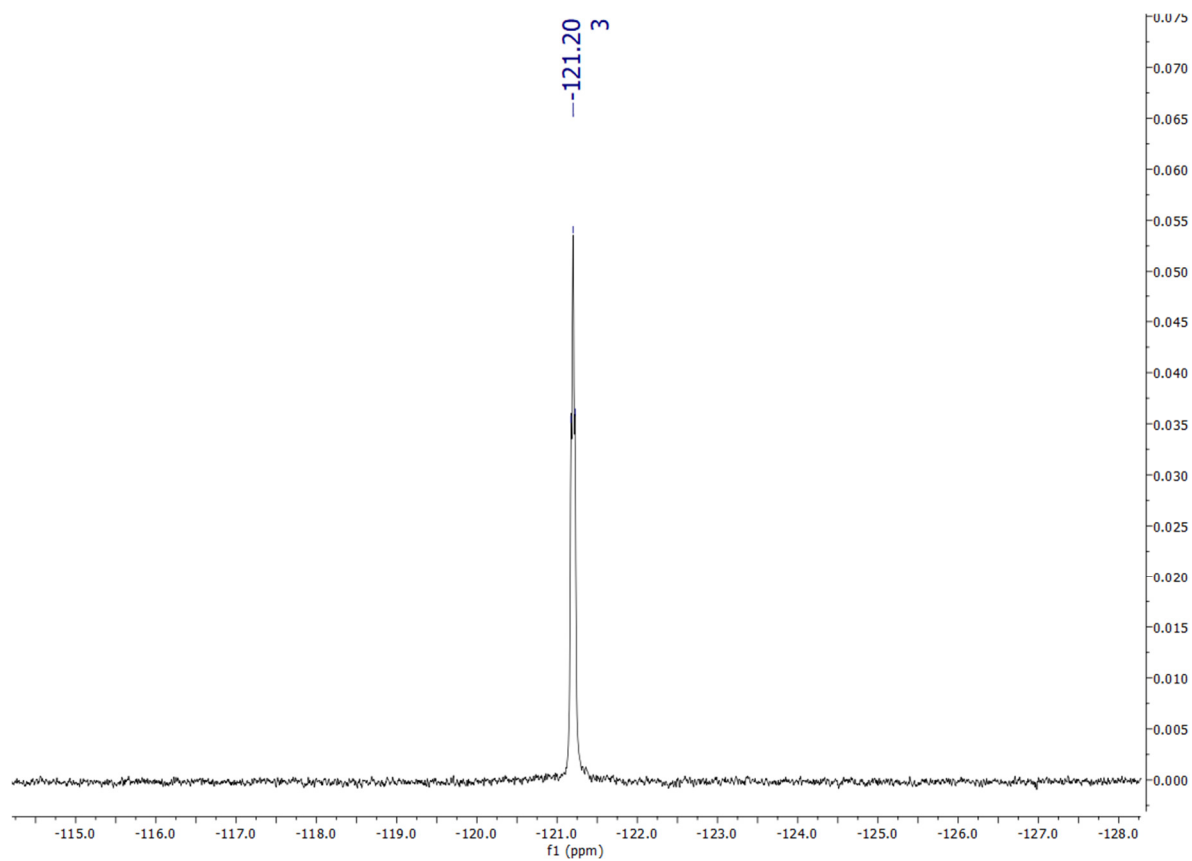

## Experiments in aqueous media

**a) Solubility in water.** A suspension of the selected iron complex (3-5 mg) in a D<sub>2</sub>O solution (0.7 mL) containing Me<sub>2</sub>SO<sub>2</sub> as internal standard ( $3.36 \cdot 10^{-3}$  M) was vigorously stirred at 21 °C for 2 h. The resulting saturated solution was filtered over celite, transferred into an NMR tube and analysed by <sup>1</sup>H NMR spectroscopy (delay time = 3 s; number of scans = 20). The concentration (solubility) was calculated by the relative integral of the starting complex with respect to Me<sub>2</sub>SO<sub>2</sub> ( $\delta/\text{ppm} = 3.14$ ). Results are compiled in Table 1.

**b) Octanol/water partition coefficients (Log  $P_{ow}$ ).** Partition coefficients ( $P_{ow}$ ; IUPAC:  $K_D$  partition constant<sup>3</sup>), defined as  $P_{ow} = c_{org}/c_{aq}$ , where  $c_{org}$  and  $c_{aq}$  are molar concentrations of the selected compound in the organic and aqueous phase, respectively, were determined by the shake-flask method and UV-Vis measurements.<sup>4,5</sup> Deionized water and 1-octanol were vigorously stirred for 24 h, to enable saturation of both phases, then separated by centrifugation. A stock solution of complex **2** (*ca.* 2 mg) was prepared by first adding DMSO, (50  $\mu\text{L}$ , to help solubilization), followed by octanol-saturated water (2.5 mL). The solution was diluted with octanol-saturated water (*ca.* 1:3 v/v ratio,  $c_{Ru} \approx 10^{-4}$  M, so that  $1.5 \leq A \leq 2.0$  at  $\lambda_{max}$ ) and its UV-Vis spectrum was recorded ( $A_{aq}^0$ ). An aliquot of the solution ( $V_{aq} = 1.2$  mL) was transferred into a test tube and water-saturated octanol ( $V_{org} = V_{aq} = 1.2$  mL) was added. The mixture was vigorously stirred for 20 min at 21 °C then centrifuged (5000 rpm, 5 min). The UV-Vis spectrum of the aqueous phase was recorded ( $A_{aq}^f$ ) and the partition coefficient was calculated as  $P_{ow} = (A_{aq}^0 - A_{aq}^f)/A_{aq}^f$  where  $A_{aq}^0$  and  $A_{aq}^f$  are the absorbance in the aqueous phase before and after partition with the organic phase, respectively.<sup>4c</sup> Unfortunately, the same method did not allow the Log  $P_{ow}$  of **1** to be determined. Although this compound is substantially inert in octanol-saturated water at room temperature, as no relevant changes were observed in the UV-Vis spectrum over 2 h, the same technique indicated fast, extensive degradation upon addition of water-saturated octanol. The absence of precipitate in the mixture suggests that **1**, rather than undergoing repartition between the two phases, undergoes degradation in the presence of a large volume of octanol.

An inverse procedure was adopted for **3** and **4**, starting from a solution of the compound in water-saturated octanol. The partition coefficient was calculated as  $P_{ow} = A_{org}^f / (A_{org}^0 - A_{org}^f)$  where  $A_{org}^0$  and  $A_{org}^f$  are the absorbance in the organic phase before and after partition with the aqueous phase, respectively. The wavelength of the maximum absorption of each compound (280 - 380 nm range) was used for UV-Vis quantitation. The procedure was repeated three times for each sample (from the same stock solution); results are given as mean  $\pm$  standard deviation (Table 1). Naphthoquinone was used as a reference compound ( $\text{Log } P_{ow} = 1.8 \pm 0.2$ ; literature: 1.71).<sup>6</sup>

**c) Stability in D<sub>2</sub>O and DMSO-d<sub>6</sub>/D<sub>2</sub>O.** Samples of **1** and **2** prepared according to the description in a) above were used in this experiment, whereas **3** and **4** were analysed in CD<sub>3</sub>OD/D<sub>2</sub>O solutions. The selected iron complex (2 mg) was dissolved in CD<sub>3</sub>OD/D<sub>2</sub>O 1:1 v/v solution (0.75 mL) containing Me<sub>2</sub>SO<sub>2</sub> as standard.<sup>7</sup> The resulting solution was stirred at 21 °C for 5 min, filtered over celite, transferred into an NMR tube, analysed by <sup>1</sup>H NMR (delay time = 3 s; number of scans = 20) and then maintained at 37 °C for 48 h. After cooling to room temperature, NMR spectra were again recorded. The percentage of remaining starting complex was calculated from the signal integrations with respect to Me<sub>2</sub>SO<sub>2</sub> ( $c = 3.3 \cdot 10^{-3} \text{ mol} \cdot \text{L}^{-1}$ ;  $\delta/\text{ppm} = 3.14$  in D<sub>2</sub>O;  $\delta/\text{ppm} = 3.05$  in CD<sub>3</sub>OD -d<sub>6</sub>/D<sub>2</sub>O 1:1 v/v).

**d) Stability in cell culture medium.** Powdered DMEM cell culture medium (1000 mg/L glucose and L-glutamine, without sodium bicarbonate and phenol red; D2902 - Merck) was dissolved in D<sub>2</sub>O (10 mg/mL), according to the manufacturer's instructions. The solution of deuterated cell culture medium ("DMEM-d") was treated with Me<sub>2</sub>SO<sub>2</sub> ( $6.6 \cdot 10^{-3} \text{ M}$ ) and NaH<sub>2</sub>PO<sub>4</sub> / Na<sub>2</sub>HPO<sub>4</sub> (0.15 M, pD = 7.5),<sup>8</sup> then stored at 4 °C under N<sub>2</sub>. The same procedure reported for c) above was followed for the preparation and analysis of the samples, using DMEM-d for **1** and **2**, and CD<sub>3</sub>OD/DMEM-d 1:1 v/v for **3** and **4**. The percentage of starting complex was calculated by signal integration with respect to the reference Me<sub>2</sub>SO<sub>2</sub> ( $\delta/\text{ppm} = 3.14$  in DMEM-d;  $\delta/\text{ppm} = 3.07$  in CD<sub>3</sub>OD/DMEM-d 1:1 v/v).



## NMR spectra in aqueous solutions

Figure S25.  $^1\text{H}$  NMR spectrum (401 MHz,  $\text{D}_2\text{O}$ ) of **2**.

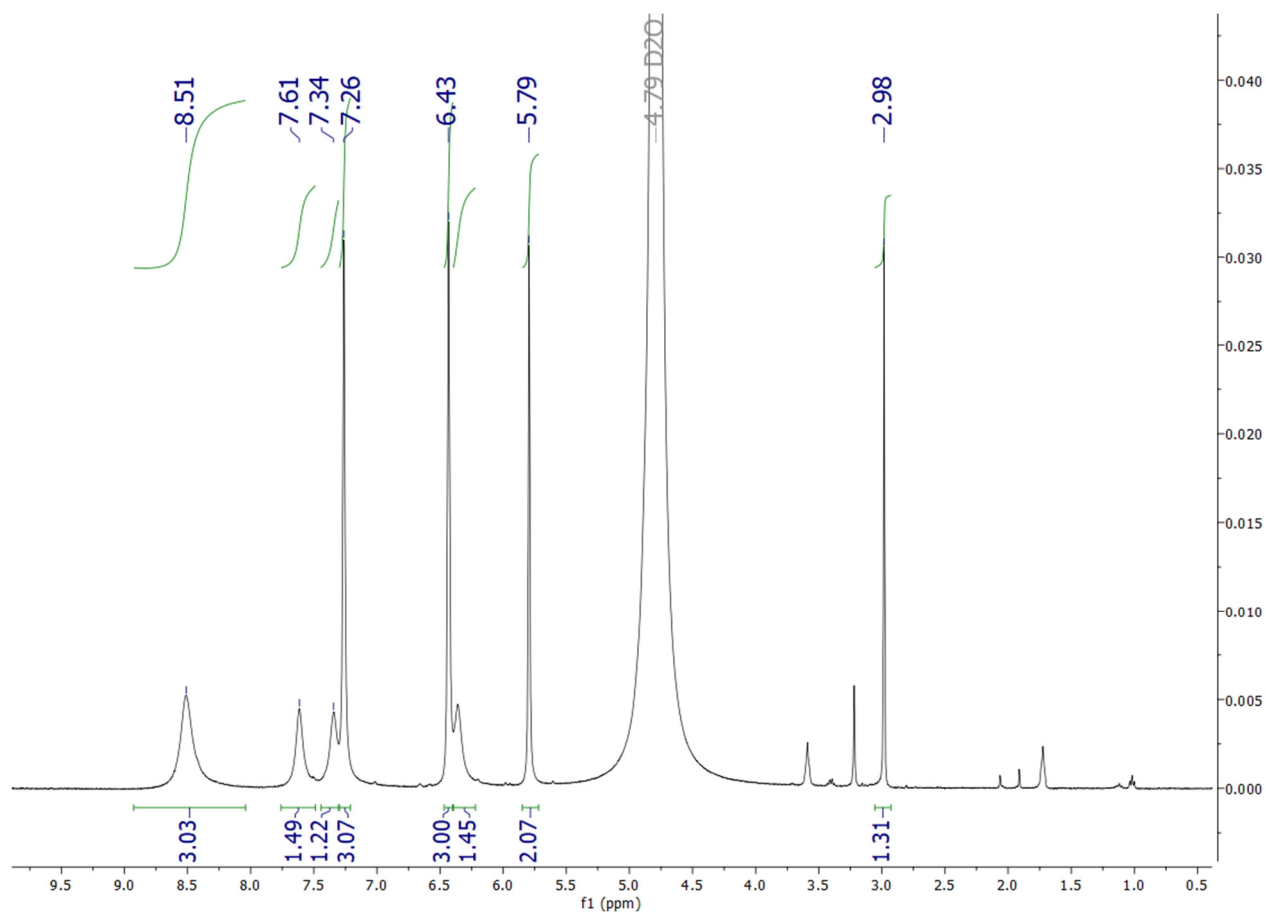

**Figure S26.**  $^1\text{H}$  NMR spectrum (401 MHz,  $\text{CD}_3\text{OD}/\text{D}_2\text{O}$  1:1 v/v) of **3**.

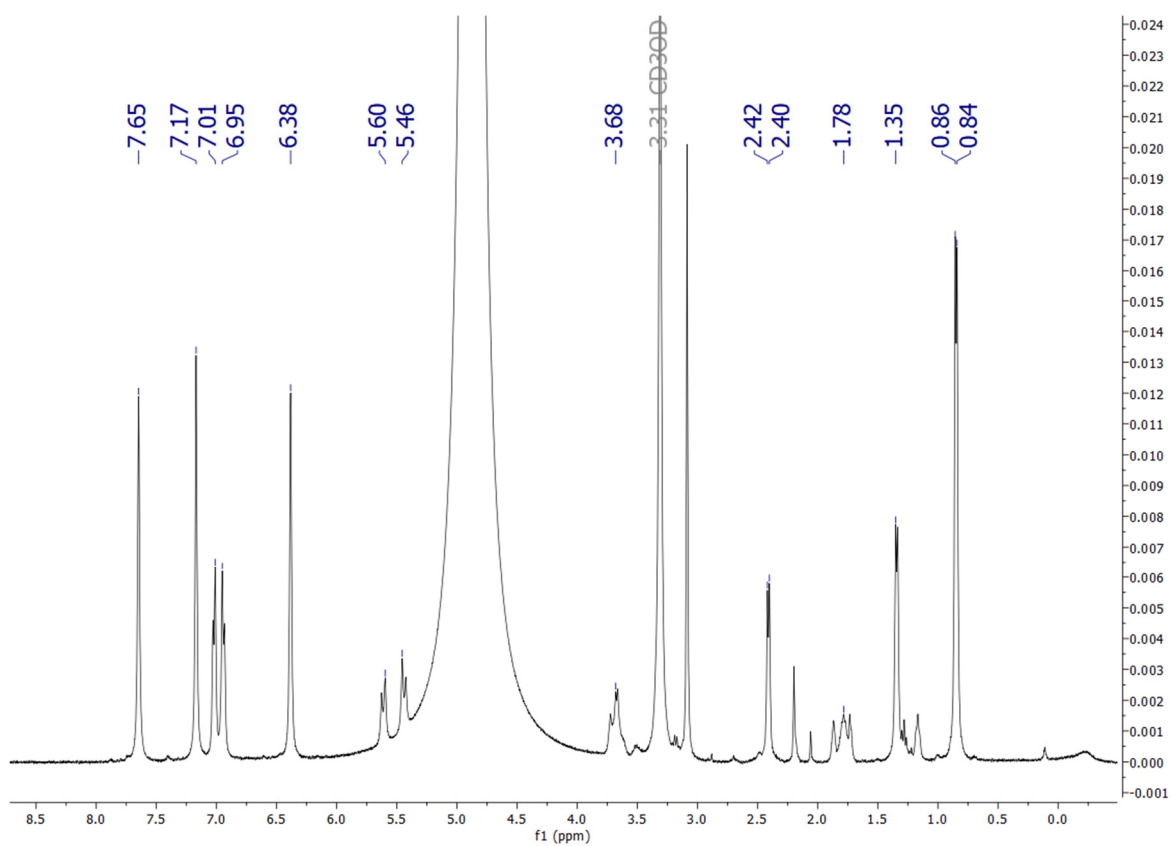

**Figure S27.**  $^1\text{H}$  NMR spectrum (401 MHz,  $\text{CD}_3\text{OD}/\text{D}_2\text{O}$  1:1 v/v) of **4**.

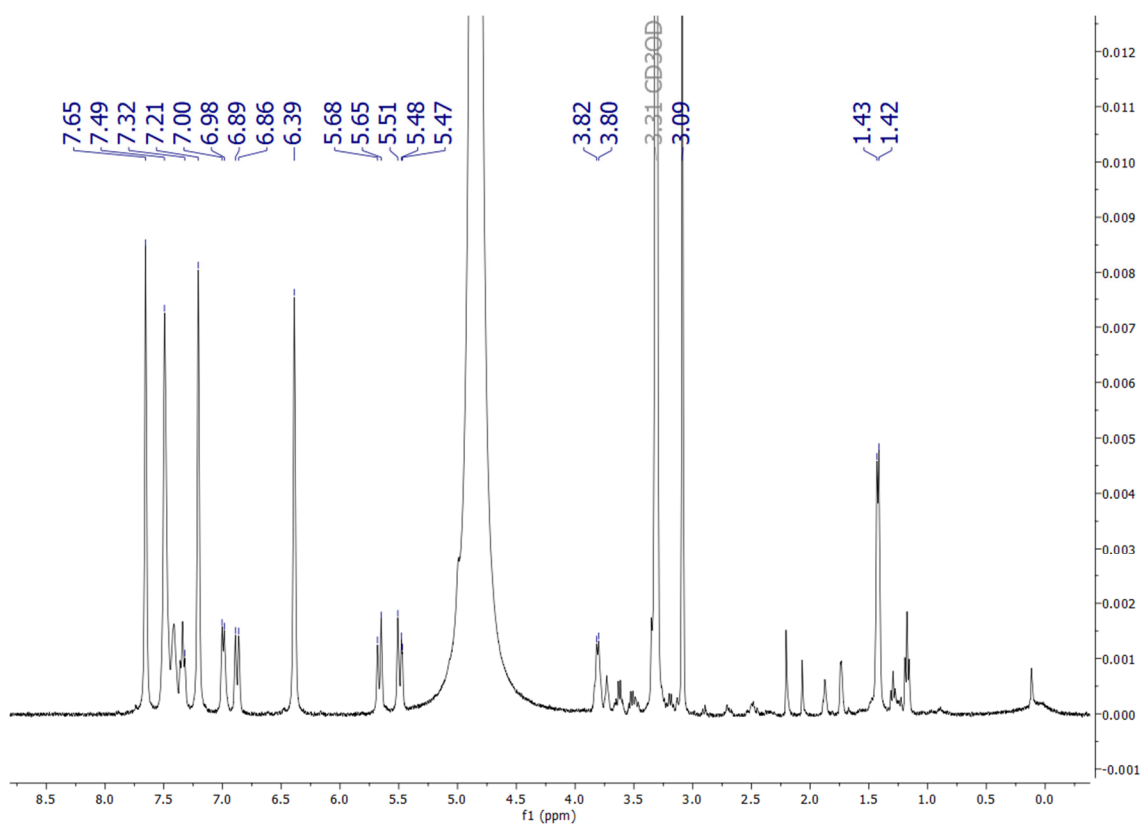

**Figure S28.** Absorbance decrease ( $F/F^0$  %) observed upon addition of the metal complex **4** to the DNA/EB mixture in aqueous buffer;  $C_{\text{DNA}} = 1.82 \times 10^{-4}$  M,  $C_{\text{EB}} = 3.32 \times 10^{-5}$  M; titrant is  $C_4 = 2.06 \times 10^{-3}$  M in DMF; aqueous buffer = NaCl 0.1 M, NaCac 0.01 M, pH = 7.0; DMF v/v% from 0 to 5.2% maximum,  $T = 25.0$  °C,  $\lambda_{\text{exc}} = 520$  nm,  $\lambda_{\text{em}} = 583$  nm,  $F^0$  is the fluorescence read at zero addition of **4**, correction for dilution factors has been considered for  $F$ . Blank test means addition of DMF only, exactly at same v/v% than the corresponding experimental point.

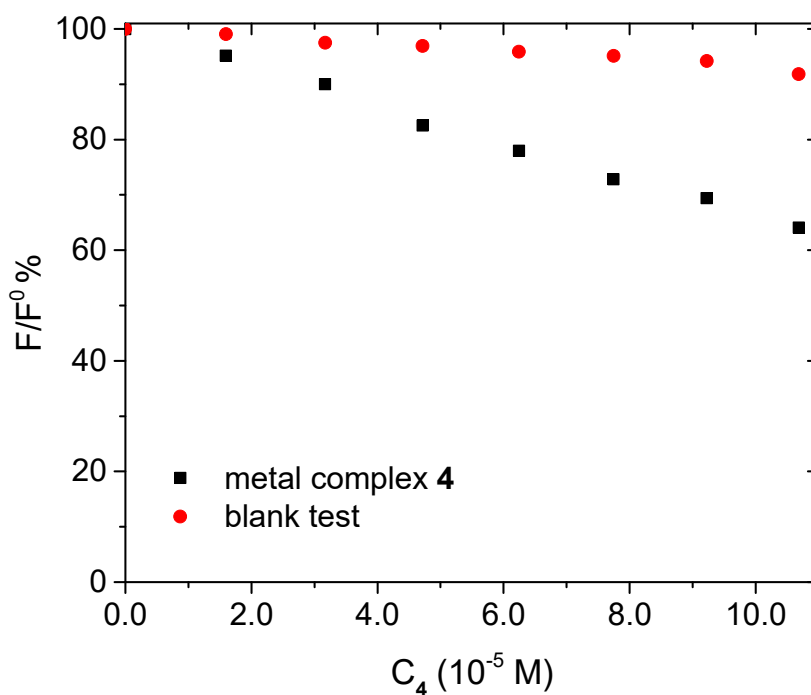

## References

---

- 1 G. M. Sheldrick, SADABS-2008/1 - Bruker AXS Area Detector Scaling and Absorption Correction, Bruker AXS: Madison, Wisconsin, USA, 2008.
- 2 G. M. Sheldrick, *Acta Cryst. C* 2015, **71**, 3.
- 3 N. M. Rice, H. M. N. H. Irving and M. A. Leonard, *Pure Appl. Chem.* 1993, **65**, 2373-2396.
- 4 L. Biancalana, L. K. Batchelor, T. Funaioli, S. Zacchini, M. Bortoluzzi, G. Pampaloni, P. J. Dyson and F. Marchetti, *Inorg. Chem.* 2018, **57**, 6669-6685.
- 5 a) OECD Guidelines for Testing of Chemicals, in OECD, Paris: 1995; Vol. 107. b) J. C. Dearden, G. M. Bresnen, *Quant. Struct.-Act. Relat.* 1988, **7**, 133-144.
- 6 D. J. Currie, C. E. Lough, R. F. Silver, H. L. Holmes, *Can. J. Chem.* 1966, **44**, 1035-1043.
- 7 T. Rundlöf, M. Mathiasson, S. Bekiroglu, B. Hakkarainen, T. Bowden, T. Arvidsson, *J. Pharm. Biomed. Anal.* 2010, **52**, 645–651.
- 8 Calculated by the formula  $pD = pH^* + 0.4$ , where  $pH^*$  is the value measured for H<sub>2</sub>O-calibrated pH-meter. a) C. C. Westcott, pH Measurements; Academic Press: New York, 1978. b) A. K. Covington, M. Paabo, R. A. Robinson and R. G. Bates, *Anal. Chem.* 1968, **40**, 700-706.
